# Supplementary material for: Psychotropic Medication Use Among Adults With Schizophrenia and Schizoaffective Disorder in the United States
Source: Atypon-hosted journal article supplement (doi:10.1176/appi.ps.201700356), 2018-04-02

**ONLINE SUPPLEMENT****Characteristics of Study Cohort in Medicaid 2010 (N=200,786)**

|                                                       | Schizophrenia<br>N=116,249 |         | Schizoaffective<br>disorder<br>N=84,537 |         |
|-------------------------------------------------------|----------------------------|---------|-----------------------------------------|---------|
|                                                       | Number                     | Percent | Number                                  | Percent |
| Age (mean, SD)                                        | 44.2                       | 12.8    | 43.2                                    | 12.6    |
| Female                                                | 47,849                     | 41.2    | 47,061                                  | 55.7    |
| Male                                                  | 68,399                     | 58.8    | 37,475                                  | 44.3    |
| White race                                            | 42,545                     | 36.6    | 36,976                                  | 43.7    |
| Black race                                            | 45,044                     | 38.8    | 27,566                                  | 32.6    |
| Asian                                                 | 2,476                      | 2.1     | 1,259                                   | 1.5     |
| Hawaiian or Pacific Islander                          | 2,336                      | 2.0     | 1,108                                   | 1.3     |
| Native American or Alaska Native                      | 1,044                      | 0.9     | 690                                     | 0.8     |
| Hispanic or Latino                                    | 12,446                     | 10.7    | 10,137                                  | 12.0    |
| More than one race                                    | 307                        | 0.3     | 258                                     | 0.3     |
| Unknown                                               | 10,051                     | 8.7     | 6,543                                   | 7.7     |
| Psychiatric comorbidities in prior year (mean, SD)    | 2.1                        | 1.4     | 2.5                                     | 1.6     |
| Medical comorbidities* in prior year (mean, SD)       | 7.0                        | 6.9     | 8.5                                     | 7.4     |
| Psychiatric hospitalizations in prior year (mean, SD) | 0.4                        | 1.6     | 0.6                                     | 2.0     |

Data are from 45 states (excludes Arizona, Delaware, Nevada, Oregon, Rhode Island, and District of Columbia)

\*We used AHRQ's Clinical Classifications Software for ICD-9-CM to classify medical comorbidities. (See appendix table below.) We excluded codes for health maintenance, treatments, and signs and symptoms that would likely be captured by other conditions.

**Psychotropic medication use for schizophrenia and schizoaffective disorder among those who received any psychotropic—percent using each psychotropic class in one year**

|                    | <b>N=116,249</b> | <b>N=84,537</b> |
|--------------------|------------------|-----------------|
|                    | Schizophrenia    | Schizoaffective |
| Antipsychotics     | 94.7             | 93.1            |
| Antidepressants    | 50.1             | 65.5            |
| Sedative/Hypnotics | 33.4             | 43.5            |
| Mood stabilizers   | 32.3             | 50.6            |
| Stimulants         | 2.2              | 3.7             |

**Psychotropic medication use for schizophrenia and schizoaffective disorder by gender—percent using each psychotropic class in one year**

|                        | <b>N=68,399</b> | <b>N=47,849</b> | <b>N=37,475</b> | <b>N=47,061</b> |
|------------------------|-----------------|-----------------|-----------------|-----------------|
|                        | Schizophrenia   | Schizophrenia   | Schizoaffective | Schizoaffective |
|                        | men             | women           | men             | women           |
| Antipsychotics         | 95.8            | 93.2            | 94.0            | 92.3            |
| Antidepressants        | 45.5            | 56.6            | 59.6            | 70.1            |
| Sedative/<br>Hypnotics | 29.9            | 38.3            | 37.8            | 48.0            |
| Mood stabilizers       | 31.0            | 34.0            | 50.0            | 51.1            |
| Stimulants             | 2.4             | 2.0             | 4.4             | 3.1             |

**Psychotropic medication use for schizophrenia and schizoaffective disorder by race and ethnicity—percent using each psychotropic class in one year**

|                        | <b>N=42,545</b> | <b>N=45,044</b> | <b>N=12,446</b> | <b>N=36,976</b> | <b>N=27,566</b> | <b>N=10,137</b> |
|------------------------|-----------------|-----------------|-----------------|-----------------|-----------------|-----------------|
|                        | Schizophrenia   | Schizophrenia   | Schizophrenia   | Schizoaffective | Schizoaffective | Schizoaffective |
|                        | White           | Black           | Hispanic        | White           | Black           | Hispanic        |
| Antipsychotics         | 93.8            | 95.1            | 95.1            | 92.7            | 93.2            | 93.1            |
| Antidepressants        | 56.1            | 45.1            | 53.1            | 69.3            | 60.9            | 68.5            |
| Sedative/<br>Hypnotics | 41.1            | 25.4            | 39.0            | 50.5            | 33.2            | 49.3            |
| Mood stabilizers       | 35.7            | 29.9            | 32.5            | 55.6            | 45.0            | 47.5            |
| Stimulants             | 3.6             | 1.2             | 1.5             | 5.3             | 2.0             | 2.4             |

**Proportion with number of psychotropic medications prescribed in year by age**

(Denominator: Schizoaffective cohort with at least one filled psychotropic prescription)

|                    | Ages <35<br>N=22,765 |         | Ages 35-49<br>N=30,083 |         | Ages 50-64<br>N=31,689 |         |
|--------------------|----------------------|---------|------------------------|---------|------------------------|---------|
|                    | Number               | Percent | Number                 | Percent | Number                 | Percent |
| Antipsychotics     | 21,201               | 93.1    | 28,124                 | 93.5    | 29,358                 | 92.6    |
| Antidepressants    | 13,688               | 60.1    | 20,517                 | 68.2    | 21,136                 | 66.7    |
| Sedative/Hypnotics | 8,193                | 36.0    | 13,718                 | 45.6    | 14,836                 | 46.8    |
| Mood stabilizers   | 12,551               | 55.1    | 15,355                 | 51.0    | 14,887                 | 47.0    |
| Stimulants         | 2,002                | 8.8     | 718                    | 2.4     | 396                    | 1.3     |

**Proportion with number of psychotropic medications prescribed in year by age**

(Denominator: Non-Schizoaffective cohort with at least one filled psychotropic prescription)

|                    | Ages <35<br>N=29,890 |         | Ages 35-49<br>N=37,810 |         | Ages 50-64<br>N=48,549 |         |
|--------------------|----------------------|---------|------------------------|---------|------------------------|---------|
|                    | Number               | Percent | Number                 | Percent | Number                 | Percent |
| Antipsychotics     | 28,308               | 94.7    | 35,971                 | 95.1    | 45,826                 | 94.4    |
| Antidepressants    | 14,299               | 47.8    | 19,496                 | 51.6    | 24,436                 | 50.3    |
| Sedative/Hypnotics | 8,526                | 28.5    | 13,066                 | 34.6    | 17,195                 | 35.4    |
| Mood stabilizers   | 10,636               | 35.6    | 12,325                 | 32.6    | 14,536                 | 29.9    |
| Stimulants         | 1,787                | 6.0     | 456                    | 1.2     | 352                    | 0.7     |

**Distribution of use of psychotropic drugs - number of unique medications within class**  
(Denominator: patients with schizoaffective disorder with at least one filled psychotropic prescription)

| <b>2010 (N=84,537)</b>             |                            |      |                             |      |                                |      |                              |      |                       |      |
|------------------------------------|----------------------------|------|-----------------------------|------|--------------------------------|------|------------------------------|------|-----------------------|------|
| Number of<br>unique<br>medications | Antipsychotics<br>N=78,683 |      | Antidepressants<br>N=55,341 |      | Sedative/Hypnotics<br>N=36,747 |      | Mood stabilizers<br>N=42,793 |      | Stimulants<br>N=3,116 |      |
|                                    | N                          | %    | N                           | %    | N                              | %    | N                            | %    | N                     | %    |
| 1                                  | 45,251                     | 57.5 | 33,683                      | 60.9 | 25,363                         | 69.0 | 32,532                       | 76.0 | 2,681                 | 86.0 |
| 2                                  | 24,132                     | 30.7 | 15,756                      | 28.5 | 8,491                          | 23.1 | 8,560                        | 20.0 | 378                   | 12.1 |
| 3                                  | 6,842                      | 8.7  | 4,524                       | 8.2  | 2,216                          | 6.0  | 1,484                        | 3.5  | 51                    | 1.6  |
| 4                                  | 1,805                      | 2.3  | 1,058                       | 1.9  | 543                            | 1.5  | 193                          | 0.5  | 5                     | 0.2  |
| 5                                  | 481                        | 0.6  | 235                         | 0.4  | 104                            | 0.3  | 22                           | 0.1  | 1                     | 0.0  |
| 6+                                 | 172                        | 0.2  | 85                          | 0.2  | 30                             | 0.1  | 2                            | 0.0  | 0                     | 0.0  |

**Distribution of use of psychotropic drugs - number of unique medications within class**

(Denominator: patients with non-schizoaffective disorder who received at least one psychotropic Rx)

| <b>2010 (N=116,249)</b>            |                             |      |                             |      |                                |      |                              |      |                       |      |
|------------------------------------|-----------------------------|------|-----------------------------|------|--------------------------------|------|------------------------------|------|-----------------------|------|
| Number of<br>unique<br>medications | Antipsychotics<br>N=110,105 |      | Antidepressants<br>N=58,231 |      | Sedative/Hypnotics<br>N=38,787 |      | Mood stabilizers<br>N=37,497 |      | Stimulants<br>N=2,595 |      |
|                                    | N                           | %    | N                           | %    | N                              | %    | N                            | %    | N                     | %    |
| 1                                  | 65,877                      | 59.8 | 40,403                      | 69.4 | 28,885                         | 74.5 | 30,624                       | 81.7 | 2,267                 | 87.4 |
| 2                                  | 32,874                      | 29.9 | 13,798                      | 23.7 | 7,762                          | 20.0 | 5,872                        | 15.7 | 277                   | 10.7 |
| 3                                  | 8,516                       | 7.7  | 3,167                       | 5.4  | 1,673                          | 4.3  | 871                          | 2.3  | 45                    | 1.7  |
| 4                                  | 2,118                       | 1.9  | 702                         | 1.2  | 378                            | 1.0  | 116                          | 0.3  | 5                     | 0.2  |
| 5                                  | 558                         | 0.5  | 122                         | 0.2  | 72                             | 0.2  | 13                           | 0.0  | 1                     | 0.0  |
| 6+                                 | 162                         | 0.1  | 39                          | 0.1  | 17                             | 0.0  | 1                            | 0.0  | 0                     | 0.0  |

| <b>Psychiatric Comorbidities in prior year (2009)</b>             |                                       |                |                                    |                |                                                  |                |
|-------------------------------------------------------------------|---------------------------------------|----------------|------------------------------------|----------------|--------------------------------------------------|----------------|
|                                                                   | <b>Full Cohort 2010<br/>N=200,786</b> |                | <b>Schizophrenia<br/>N=116,249</b> |                | <b>Schizoaffective<br/>disorder<br/>N=84,537</b> |                |
|                                                                   | <b>Number</b>                         | <b>Percent</b> | <b>Number</b>                      | <b>Percent</b> | <b>Number</b>                                    | <b>Percent</b> |
| Psychiatric comorbidities in prior year (mean, SD)*               | 1.2                                   | 1.4            | 1.0                                | 1.3            | 1.4                                              | 1.4            |
| Psychiatric hospitalizations in prior year (mean, SD)*            | 0.2                                   | 1.2            | 0.1                                | 1.1            | 0.2                                              | 1.3            |
| Adjustment disorders                                              | 5,079                                 | 2.5            | 2,558                              | 2.2            | 2,521                                            | 3.0            |
| Anxiety disorders                                                 | 38,848                                | 19.4           | 18,807                             | 16.2           | 20,041                                           | 23.7           |
| Attention-deficit, conduct, and disruptive behavior disorders     | 12,599                                | 6.3            | 6,471                              | 5.6            | 6,128                                            | 7.3            |
| Delirium, dementia, and amnestic and other cognitive disorders    | 7,646                                 | 3.8            | 4,525                              | 3.9            | 3,121                                            | 3.6            |
| Developmental disorders                                           | 16,385                                | 8.2            | 9,517                              | 8.2            | 6,868                                            | 8.1            |
| Disorders usually diagnosed in infancy, childhood, or adolescence | 2,696                                 | 1.3            | 1,445                              | 1.2            | 1,251                                            | 1.5            |
| Impulse control disorders, NEC                                    | 3,123                                 | 1.6            | 1,502                              | 1.3            | 1,621                                            | 1.9            |
| Mood disorders                                                    | 80,832                                | 40.3           | 39,237                             | 33.8           | 41,595                                           | 49.2           |
| Personality disorders                                             | 10,900                                | 5.4            | 4,679                              | 4.0            | 6,221                                            | 7.4            |
| Alcohol-related disorders                                         | 19,965                                | 9.9            | 10,627                             | 9.1            | 9,338                                            | 11.1           |
| Substance-related disorders                                       | 31,960                                | 15.9           | 16,520                             | 14.2           | 15,440                                           | 18.3           |
| Miscellaneous disorders                                           | 8,168                                 | 4.1            | 4,269                              | 3.7            | 3,899                                            | 4.6            |

\* Excluding schizophrenia and suicide

FIGURE. Total number of different psychotropic medications in one year for patients with schizophrenia (N=116,249) and schizoaffective disorder (N=84,537)

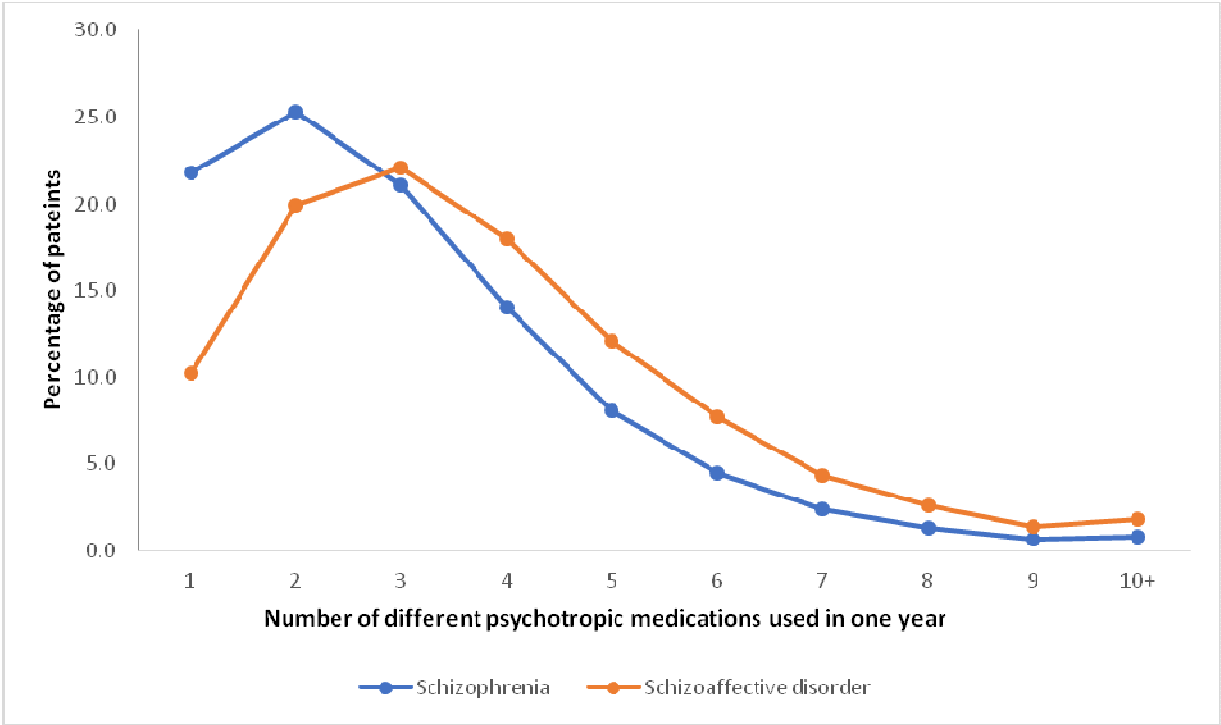

Supplement: appi.ps.201700356.ds001.pdf [file appi.ps.201700356.ds001.pdf]
